# Supplementary material for: A workflow for the integrative transcriptomic description of molecular pathology and the suggestion of normalizing compounds, exemplified by Parkinson’s disease
Source: PubMed Central journal article supplement (PMC5962550; doi:10.1038/s41598-018-25754-5), 2018-05-21

## **Supplementary Information**

### **A workflow for the integrative transcriptomic description of molecular pathology and the suggestion of normalizing compounds, exemplified by Parkinson's disease**

Mohamed Hamed<sup>1</sup>, Yvonne Gladbach<sup>1</sup>, Steffen Möller<sup>1</sup>, Sarah Fischer<sup>1</sup>, Mathias Ernst<sup>1</sup>,  
Stephan Struckmann<sup>1</sup>, Alexander Storch<sup>2</sup>, Georg Fuellen<sup>1§</sup>

<sup>1</sup>Institute for Biostatistics and Informatics in Medicine and Ageing Research, Rostock University Medical Center, Rostock, Germany.

<sup>2</sup>Department of Neurology, University of Rostock, Rostock, Germany.

## Supplementary Tables

**Table S1 – Enrichment of the 116 dysregulated genes with GO terms and KEGG pathways.** The table lists the top 30 significant GO terms and the entire list of the enriched pathways.

| Category     | Term                                                                 | Count | Adj p-value |
|--------------|----------------------------------------------------------------------|-------|-------------|
| GOTERM_BP    | GO:0006119~oxidative phosphorylation                                 | 12    | 1,08E-05    |
| GOTERM_BP    | GO:0042773~ATP synthesis coupled electron transport                  | 10    | 2,14E-06    |
| GOTERM_BP    | GO:0042775~mitochondrial ATP synthesis coupled electron transport    | 10    | 2,14E-06    |
| GOTERM_BP    | GO:0022904~respiratory electron transport chain                      | 10    | 7,43E-05    |
| GOTERM_BP    | GO:0006091~generation of precursor metabolites and energy            | 17    | 7,91E-05    |
| GOTERM_BP    | GO:0045333~cellular respiration                                      | 10    | 3,17E-07    |
| GOTERM_BP    | GO:0022900~electron transport chain                                  | 10    | 1,30E-09    |
| GOTERM_BP    | GO:0006120~mitochondrial electron transport, NADH to ubiquinone      | 7     | 5,21E-08    |
| GOTERM_BP    | GO:0015980~energy derivation by oxidation of organic compounds       | 10    | 9,53E-08    |
| GOTERM_BP    | GO:0006810~transport                                                 | 39    | 7,21E-09    |
| GOTERM_BP    | GO:0006414~translational elongation                                  | 8     | 8,24E-09    |
| GOTERM_BP    | GO:0051234~establishment of localization                             | 39    | 9,23E-09    |
| GOTERM_BP    | GO:0051179~localization                                              | 41    | 2,52E-11    |
| GOTERM_BP    | GO:0032269~negative regulation of cellular protein metabolic process | 9     | 4,73E-10    |
| GOTERM_BP    | GO:0051248~negative regulation of protein metabolic process          | 9     | 6,19E-10    |
| GOTERM_BP    | GO:0006412~translation                                               | 11    | 1,38E-11    |
| GOTERM_BP    | GO:0016310~phosphorylation                                           | 17    | 1,89E-12    |
| GOTERM_BP    | GO:0031400~negative regulation of protein modification process       | 7     | 2,20E-11    |
| GOTERM_BP    | GO:0051258~protein polymerization                                    | 5     | 4,24E-12    |
| GOTERM_BP    | GO:0055114~oxidation reduction                                       | 14    | 6,80E-11    |
| GOTERM_BP    | GO:0070271~protein complex biogenesis                                | 12    | 0.001       |
| GOTERM_BP    | GO:0006461~protein complex assembly                                  | 12    | 0.001       |
| GOTERM_BP    | GO:0030182~neuron differentiation                                    | 11    | 0.0012      |
| GOTERM_BP    | GO:0022008~neurogenesis                                              | 13    | 0.00129     |
| GOTERM_BP    | GO:0006796~phosphate metabolic process                               | 17    | 0.0016      |
| GOTERM_BP    | GO:0006793~phosphorus metabolic process                              | 17    | 0.00156     |
| GOTERM_BP    | GO:0001963~synaptic transmission, dopaminergic                       | 3     | 0.0018      |
| GOTERM_BP    | GO:0048699~generation of neurons                                     | 12    | 0.0023      |
| GOTERM_BP    | GO:0046907~intracellular transport                                   | 13    | 0.0027      |
| GOTERM_BP    | GO:0065003~macromolecular complex assembly                           | 13    | 0.003       |
| KEGG_PATHWAY | hsa05012: Parkinson's disease                                        | 15    | 2.09E-06    |
| KEGG_PATHWAY | hsa00190: Oxidative phosphorylation                                  | 13    | 3.41E-08    |
| KEGG_PATHWAY | hsa05016: Huntington's disease                                       | 14    | 1.62E-08    |
| KEGG_PATHWAY | hsa05010: Alzheimer's disease                                        | 13    | 4.22E-08    |
| KEGG_PATHWAY | hsa03010: Ribosome                                                   | 7     | 6.02E-11    |
| KEGG_PATHWAY | hsa04260: Cardiac muscle contraction                                 | 6     | 0.0025      |

**Table S2 – GO enrichment analysis of PD-GRN genes.**

| Term                                                                                | Count | Adj p-value |
|-------------------------------------------------------------------------------------|-------|-------------|
| GO:0006753~nucleoside phosphate metabolic process                                   | 5     | 0.003       |
| GO:0009117~nucleotide metabolic process                                             | 5     | 0.003       |
| GO:0055086~nucleobase, nucleoside and nucleotide metabolic process                  | 5     | 0.003       |
| GO:0044271~nitrogen compound biosynthetic process                                   | 5     | 0.004       |
| GO:0051259~protein oligomerization                                                  | 4     | 0.005       |
| GO:0009165~nucleotide biosynthetic process                                          | 4     | 0.006       |
| GO:0016043~cellular component organization                                          | 12    | 0.006       |
| GO:0034654~nucleobase, nucleoside, nucleotide and nucleic acid biosynthetic process | 4     | 0.006       |
| GO:0034404~nucleobase, nucleoside and nucleotide biosynthetic process               | 4     | 0.006       |
| GO:0006810~transport                                                                | 12    | 0.009       |
| GO:0042493~response to drug                                                         | 4     | 0.009       |
| GO:0051234~establishment of localization                                            | 12    | 0.009       |
| GO:0006066~alcohol metabolic process                                                | 5     | 0.01        |
| GO:0030182~neuron differentiation                                                   | 5     | 0.01        |
| GO:0010894~negative regulation of steroid biosynthetic process                      | 2     | 0.016       |
| GO:0045939~negative regulation of steroid metabolic process                         | 2     | 0.016       |
| GO:0008217~regulation of blood pressure                                             | 3     | 0.017       |
| GO:0019216~regulation of lipid metabolic process                                    | 3     | 0.021       |
| GO:0051179~localization                                                             | 12    | 0.023       |
| GO:0044057~regulation of system process                                             | 4     | 0.023       |
| GO:0048699~generation of neurons                                                    | 5     | 0.023       |
| GO:0048666~neuron development                                                       | 4     | 0.029       |
| GO:0051055~negative regulation of lipid biosynthetic process                        | 2     | 0.029       |
| GO:0022008~neurogenesis                                                             | 5     | 0.03        |
| GO:0006164~purine nucleotide biosynthetic process                                   | 3     | 0.035       |
| GO:0055114~oxidation reduction                                                      | 5     | 0.036       |
| GO:0016044~membrane organization                                                    | 4     | 0.039       |
| GO:0042417~dopamine metabolic process                                               | 2     | 0.039       |
| GO:0048523~negative regulation of cellular process                                  | 8     | 0.039       |
| GO:0006575~cellular amino acid derivative metabolic process                         | 3     | 0.043       |
| GO:0050810~regulation of steroid biosynthetic process                               | 2     | 0.048       |
| GO:0032269~negative regulation of cellular protein metabolic process                | 3     | 0.049       |
| GO:0008219~cell death                                                               | 5     | 0.005       |
| GO:0003013~circulatory system process                                               | 3     | 0.005       |
| GO:0006163~purine nucleotide metabolic process                                      | 3     | 0.005       |
| GO:0008015~blood circulation                                                        | 3     | 0.005       |
| GO:0043065~positive regulation of apoptosis                                         | 4     | 0.005       |
| GO:0051248~negative regulation of protein metabolic process                         | 3     | 0.005       |
| GO:0016265~death                                                                    | 5     | 0.005       |
| GO:0043068~positive regulation of programmed cell death                             | 4     | 0.005       |
| GO:0010942~positive regulation of cell death                                        | 4     | 0.005       |

|                                                                    |   |       |
|--------------------------------------------------------------------|---|-------|
| GO:0045833~negative regulation of lipid metabolic process          | 2 | 0.005 |
| GO:0048519~negative regulation of biological process               | 8 | 0.006 |
| GO:0007399~nervous system development                              | 6 | 0.006 |
| GO:0006916~anti-apoptosis                                          | 3 | 0.006 |
| GO:0048667~cell morphogenesis involved in neuron differentiation   | 3 | 0.006 |
| GO:0009712~catechol metabolic process                              | 2 | 0.007 |
| GO:0006584~catecholamine metabolic process                         | 2 | 0.007 |
| GO:0034311~diol metabolic process                                  | 2 | 0.007 |
| GO:0009892~negative regulation of metabolic process                | 5 | 0.007 |
| GO:0018958~phenol metabolic process                                | 2 | 0.007 |
| GO:0019218~regulation of steroid metabolic process                 | 2 | 0.007 |
| GO:0042981~regulation of apoptosis                                 | 5 | 0.007 |
| GO:0043067~regulation of programmed cell death                     | 5 | 0.007 |
| GO:0010941~regulation of cell death                                | 5 | 0.008 |
| GO:0006461~protein complex assembly                                | 4 | 0.008 |
| GO:0070271~protein complex biogenesis                              | 4 | 0.008 |
| GO:0034599~cellular response to oxidative stress                   | 2 | 0.008 |
| GO:0051240~positive regulation of multicellular organismal process | 3 | 0.008 |
| GO:0000904~cell morphogenesis involved in differentiation          | 3 | 0.008 |
| GO:0051649~establishment of localization in cell                   | 5 | 0.009 |
| GO:0046890~regulation of lipid biosynthetic process                | 2 | 0.009 |
| GO:0043524~negative regulation of neuron apoptosis                 | 2 | 0.01  |
| GO:0048518~positive regulation of biological process               | 8 | 0.01  |

**Table S3 – The list of TF-miRNA co-regulatory motifs identified in the PD-GRN network.** *P-values* were computed for motif types (not for each individual motif) by comparing their count in the real network (PD-GRN) to their counts in randomized variants of these networks preserving the same node degrees. All identified motifs were belonging to one motif type (cascaded-miRNAs-mediated, which includes a TF regulation of the expression of a miRNA that in turns represses a target gene) with a corrected p-value 0.03. The BH method was used for multiple test correction.

| Motif ID | Motif Type              | TF    | miRNA        | Target   | Co-regulated targets                                                            |
|----------|-------------------------|-------|--------------|----------|---------------------------------------------------------------------------------|
| 1        | CASCADED-MIRNA-MEDIATED | CEBPB | hsa-mir-130b | MAP4     | NDUFA4, CNOT1, ATP1B1, SOD1, NOLC1, SNN, DYNC1LI2, EPB41L1, YWHAB, PSAP, HPRT1  |
| 2        | CASCADED-MIRNA-MEDIATED | CEBPB | hsa-mir-130b | YWHAB    | NDUFA4, CNOT1, ATP1B1, SOD1, NOLC1, SNN, DYNC1LI2, EPB41L1, PSAP, MAP4, HPRT1   |
| 3        | CASCADED-MIRNA-MEDIATED | CEBPB | hsa-mir-130b | DYNC1LI2 | NDUFA4, CNOT1, ATP1B1, SOD1, NOLC1, SNN, EPB41L1, YWHAB, PSAP, MAP4, HPRT1      |
| 4        | CASCADED-MIRNA-MEDIATED | CEBPB | hsa-mir-130b | HPRT1    | NDUFA4, CNOT1, ATP1B1, SOD1, NOLC1, SNN, DYNC1LI2, EPB41L1, YWHAB, PSAP, MAP4   |
| 5        | CASCADED-MIRNA-MEDIATED | CEBPB | hsa-mir-130b | EPB41L1  | NDUFA4, CNOT1, ATP1B1, SOD1, NOLC1, SNN, DYNC1LI2, YWHAB, PSAP, MAP4, HPRT1     |
| 6        | CASCADED-MIRNA-MEDIATED | CEBPB | hsa-mir-130b | SNN      | NDUFA4, CNOT1, ATP1B1, SOD1, NOLC1, DYNC1LI2, EPB41L1, YWHAB, PSAP, MAP4, HPRT1 |
| 7        | CASCADED-MIRNA-MEDIATED | CEBPB | hsa-mir-130b | PSAP     | NDUFA4, CNOT1, ATP1B1, SOD1, NOLC1, SNN, DYNC1LI2, EPB41L1, YWHAB, MAP4, HPRT1  |
| 8        | CASCADED-MIRNA-MEDIATED | CEBPB | hsa-mir-636  | YWHAB    | NDUFA4, CNOT1, ATP1B1, SOD1, NOLC1, EPB41L1, SV2A, FEZ1                         |
| 9        | CASCADED-MIRNA-MEDIATED | CEBPB | hsa-mir-636  | SV2A     | NDUFA4, CNOT1, ATP1B1, SOD1, NOLC1, EPB41L1, FEZ1, YWHAB                        |
| 10       | CASCADED-MIRNA-MEDIATED | CEBPB | hsa-mir-636  | EPB41L1  | NDUFA4, CNOT1, ATP1B1, SOD1, NOLC1, SV2A, FEZ1, YWHAB                           |
| 11       | CASCADED-MIRNA-MEDIATED | CEBPB | hsa-mir-636  | FEZ1     | NDUFA4, CNOT1, ATP1B1, SOD1, NOLC1, EPB41L1, SV2A, YWHAB                        |

**Table S4 – Top ten predicted LINCS small molecules that reverse the transcriptional activities of the merged functional module and that therefore may inhibit the underlying regulatory mechanisms of PD pathogenesis.** Interestingly, most of them were found to be neuroprotective agents or signaling pathway inhibitors that are relevant to neurodegenerative diseases.

| Ranking based on drug score (see methods) | Small molecule | Concentration | Application time | Cell type | Clinical Relevance to neurological diseases supported by literature evidences                                                                                                                                                                                                                                                                                                                                                                                                                                        |
|-------------------------------------------|----------------|---------------|------------------|-----------|----------------------------------------------------------------------------------------------------------------------------------------------------------------------------------------------------------------------------------------------------------------------------------------------------------------------------------------------------------------------------------------------------------------------------------------------------------------------------------------------------------------------|
| 1                                         | GDC-0068       | 0.04um        | 24h              | CD34      | GDC-0068 is an inhibitor for AKT signaling pathway, which has a crucial role in PD prognosis ( <a href="https://www.ncbi.nlm.nih.gov/pmc/articles/PMC4499569/">https://www.ncbi.nlm.nih.gov/pmc/articles/PMC4499569/</a> )                                                                                                                                                                                                                                                                                           |
| 2                                         | Brivanib       | 1.11um        | 24h              | MDAMB231  | Brivanib is a novel VEGF-R2/bFGF-R signaling inhibitor, which is used for mediating signals by Alzheimer's $\beta$ -amyloid peptide ( <a href="http://onlinelibrary.wiley.com/doi/10.1111/j.1471-4159.2009.06426.x/full">http://onlinelibrary.wiley.com/doi/10.1111/j.1471-4159.2009.06426.x/full</a> ).                                                                                                                                                                                                             |
| 3                                         | Erlotinib      | 3.33um        | 24h              | MDAMB231  | Erlotinib is an EGFR inhibitor that delays the disease progression of ALS Amyotrophic lateral sclerosis (ALS), a neurodegenerative disease due to neuron death. ( <a href="http://journals.plos.org/plosone/article?id=10.1371/journal.pone.0062342">http://journals.plos.org/plosone/article?id=10.1371/journal.pone.0062342</a> )                                                                                                                                                                                  |
| 4                                         | JWE-035        | 0.12um        | 24h              | HME1      | JWE-035 targets the aurora kinase A protein, which is used for glioblastoma therapy ( <a href="http://thejns.org/doi/pdf/10.3171/2010.3.PEDS10120">http://thejns.org/doi/pdf/10.3171/2010.3.PEDS10120</a> ).                                                                                                                                                                                                                                                                                                         |
| 5                                         | Torin-2        | 0.37um        | 24h              | MDAMB231  | Torin-2 is a mTor inhibitor that prevents neuron cell death in substantia nigra neurons from PD model ( <a href="https://www.dovepress.com/recent-insights-into-the-pathophysiology-of-mtor-pathway-dysregulation-peer-reviewed-fulltext-article-RRB">https://www.dovepress.com/recent-insights-into-the-pathophysiology-of-mtor-pathway-dysregulation-peer-reviewed-fulltext-article-RRB</a> ), ( <a href="http://www.jneurosci.org/content/26/39/9996.long">http://www.jneurosci.org/content/26/39/9996.long</a> ) |
| 6                                         | BX-912         | 10um          | 24h              | MDAMB231  | BX-912 targets PDK1, A key player in the PI3K signaling pathway, which is strongly deregulated in PD cases ( <a href="https://www.ncbi.nlm.nih.gov/pmc/articles/PMC4068290/">https://www.ncbi.nlm.nih.gov/pmc/articles/PMC4068290/</a> )                                                                                                                                                                                                                                                                             |
| 7                                         | PHA-665752     | 0.37um        | 24h              | MDAMB231  | This small molecule is an inhibitor for c-Met pathway, which has been implicated in neuroprotection, especially against Alzheimer and PD ( <a href="https://www.ncbi.nlm.nih.gov/pmc/articles/PMC3829467/">https://www.ncbi.nlm.nih.gov/pmc/articles/PMC3829467/</a> ).                                                                                                                                                                                                                                              |
| 8                                         | HY-11007       | 0.04um        | 24h              | HME1      | HY-11007 is known by a product name "GNF-2", which is a BCR- ABL inhibitor. These inhibitors were examined regarding their neuroprotective or therapeutic role in PD ( <a href="http://www.mdsabstracts.org/abstract/bcr-abl-tyrosine-kinase-inhibitors-b-atki-and-parkinsons-disease-pd/">http://www.mdsabstracts.org/abstract/bcr-abl-tyrosine-kinase-inhibitors-b-atki-and-parkinsons-disease-pd/</a> ).                                                                                                          |
| 9                                         | Staurosporine  | 1um           | 6h               | MCF7      | Staurosporine induces neuron apoptosis and has protective effects against PD ( <a href="https://www.ncbi.nlm.nih.gov/pubmed/16079129">https://www.ncbi.nlm.nih.gov/pubmed/16079129</a> ).                                                                                                                                                                                                                                                                                                                            |
| 10                                        | SB590885       | 1.11um        | 24h              | MDAMB231  | This small molecule targets BRAF, whose inhibition by SB590885 leads to enhanced CNS penetration and might be valuable in stroke treatment ( <a href="https://www.ncbi.nlm.nih.gov/pubmed/18621524">https://www.ncbi.nlm.nih.gov/pubmed/18621524</a> ).                                                                                                                                                                                                                                                              |

Table S5 – A comparison between our approach and similar approaches/tools

| Approach<br>/Tool<br>[reference] | Input data                  | Performed Analysis/ highlights                                                                                                                                                                                                                                                                                                                                                                                                                                                                                                                                | Output                                                                                                                                                                                                                                                                                                                                                     | Accessibility                           | Integrated ontologies<br>/tools                                                                                                                                                                                          |
|----------------------------------|-----------------------------|---------------------------------------------------------------------------------------------------------------------------------------------------------------------------------------------------------------------------------------------------------------------------------------------------------------------------------------------------------------------------------------------------------------------------------------------------------------------------------------------------------------------------------------------------------------|------------------------------------------------------------------------------------------------------------------------------------------------------------------------------------------------------------------------------------------------------------------------------------------------------------------------------------------------------------|-----------------------------------------|--------------------------------------------------------------------------------------------------------------------------------------------------------------------------------------------------------------------------|
| <b>Our approach</b>              | -miRNA, and mRNA expression | <ul style="list-style-type: none"> <li>-Differential analysis for genes/ miRNAs</li> <li>-Construction of regulatory interactions between deregulated miRNAs and mRNAs</li> <li>-Gene Regulatory network analysis</li> <li>-Enrichment analysis of deregulated genes and miRNAs</li> <li>-Identification of putative driver genes/miRNAs</li> <li>-Detection of functional network modules (network motifs)</li> <li>-Semantic and statistical validation of the identified functional modules</li> <li>-Prediction of normalizing small compounds</li> </ul> | <ul style="list-style-type: none"> <li>-Gene Regulatory network</li> <li>-Disease specific network</li> <li>-Significant functional network modules (3-node network motifs)</li> <li>-Driver genes/miRNAs</li> <li>-Enriched GO terms and pathways for genes and miRNAs</li> <li>-Drugs normalizing the disease-induced transcriptional effects</li> </ul> | -In two parts: R script and web service | <ul style="list-style-type: none"> <li>-TRED</li> <li>-Transmir</li> <li>-Tarbase</li> <li>-miRtarbase</li> <li>-starBase</li> <li>-ChIPBase</li> <li>-PmmR</li> <li>-DAVID</li> <li>-HMDD</li> <li>-DisGeNET</li> </ul> |
| <b>MMIA [61]</b>                 | -miRNA, and mRNA expression | <ul style="list-style-type: none"> <li>-Gene set enrichment analysis</li> <li>-miRNA target prediction</li> <li>-Inverse correlation analysis between miRNA and mRNA expression</li> <li>-Identification of dysregulated miRNAs</li> <li>-Identification of TFBS of miRNA target genes</li> </ul>                                                                                                                                                                                                                                                             | <ul style="list-style-type: none"> <li>-Diseases associated with miRNAs</li> <li>-TFBS in promoter regions of predicted targets</li> <li>-Enriched GO terms and Pathways</li> </ul>                                                                                                                                                                        | -Web service                            | <ul style="list-style-type: none"> <li>-TargetScan</li> <li>-PicTar</li> <li>-PITA</li> </ul>                                                                                                                            |

|                        |                                                    |                                                                                                                                                                                                          |                                                                                                                                                                                                                                           |              |                                                                        |
|------------------------|----------------------------------------------------|----------------------------------------------------------------------------------------------------------------------------------------------------------------------------------------------------------|-------------------------------------------------------------------------------------------------------------------------------------------------------------------------------------------------------------------------------------------|--------------|------------------------------------------------------------------------|
| <b>MAGIA [62]</b>      | -miRNA, and mRNA expression                        | -Gene regulatory network of miRNA and mRNA interactions<br>-miRNA target prediction<br>-Gene set enrichment analysis<br>-Utilization of different association measures between miRNA and mRNA expression | -Top 250 most probable functional miRNA-mRNA interactions<br>-Bipartite regulatory network<br>-Links to DAVID, PubFocus, EBIMed                                                                                                           | -Web service | -PITA<br>-miRanda<br>-TargetScan<br>-RNAhybrid                         |
| <b>miRTrail [63]</b>   | -miRNA expression                                  | -Identification of deregulated miRNAs<br>-miRNA target enrichment analysis<br>-Gene set enrichment analysis and over-representation analysis (ORA)<br>-Network visualization using BINA and Cytoscape    | -Contingency table<br>-Venn diagrams for miRNA target overlaps with studied disease<br>-ORA for the deregulated miRNA and their gene targets<br>-Common pathway analysis<br>-Network analysis with ORA of custom selected network modules | -Web service | -microCosm<br>-miRanda<br>-geneTrail<br>-NIH human disease<br>Datasets |
| <b>Dis TMGneT [64]</b> | -Predefined set(s) of cancer related genes/ miRNAs | -TF-miRNA regulatory interactions<br>-Network analysis<br>-Disease specific network<br>-Shortest paths between TF-miRNA pairs<br>-Identification of minimal regulatory modules                           | -Gene regulatory network and comprehensive network analysis                                                                                                                                                                               | -Web service | -PITA<br>-PuTmiR                                                       |



## Supplementary Figures

**Figure S1 – miRNA sample clustering and heatmap.** (a) The heatmap visualization of the 19-dysregulated miRNAs. The miRNA expression values were normalized and scaled before visualization. (b) The PCA clustering for the normalized miRNA expression samples. The two highlighted PD samples are incorrectly clustered to the control cohort. They could be mislabelled and nevertheless they had negligible impact on the analysis when we excluded them.

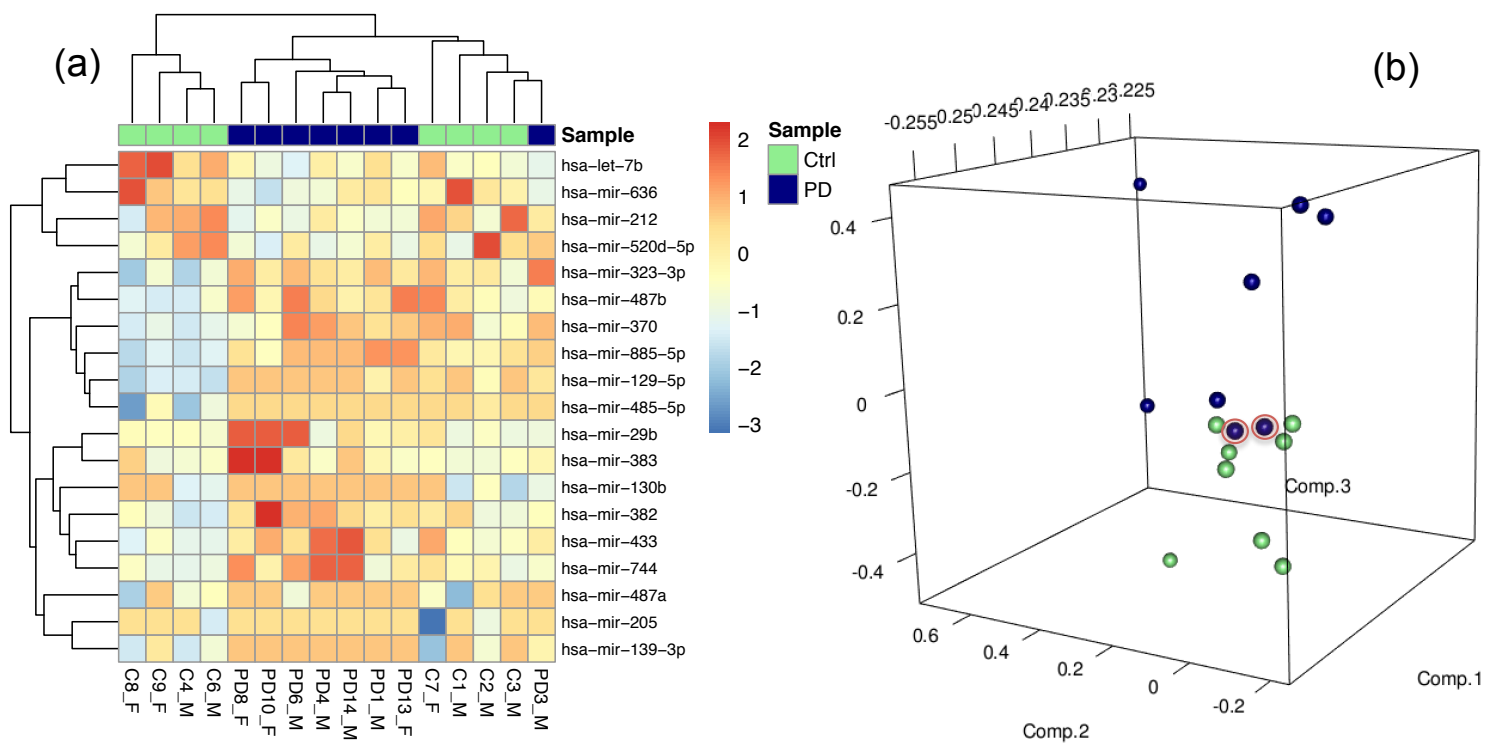

**Figure S2 – The merged visualization of motifs A and B in the PD-GRN network.** (a) The merged motif and (b) its functional homogeneity plot depicting the cumulative distribution of GO functional semantic scores of gene pairs of co-regulated genes in the examined motif (red) versus randomly selected genes (black). The p-value was calculated using the Kolmogorov- Smirnov test. The network motifs were visualized using the Cytoscape tool.

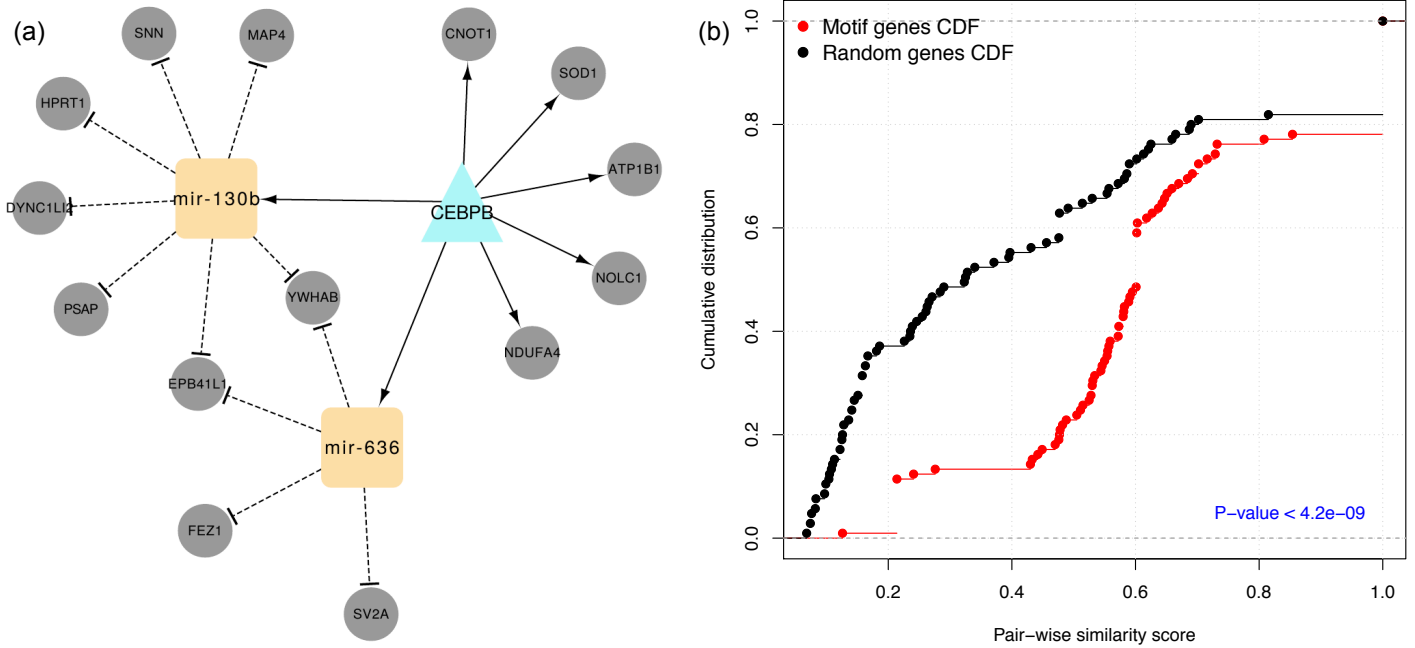

**Figure S3 – Rank-Rank-Hypergeometric Overlap (RRHO) maps for the top predicted 16 Cmap drugs that reverse the whole PD expression signatures.** The X- and Y-axis correspond to the ranked inverted gene expression profile for PD as described in the main text (from most downregulated to most upregulated), and to the Cmap gene expression profile indicated in the title of each map (ranked from most upregulated to most downregulated), respectively. Each data point  $x,y$  represents the significance of the overlap of two gene lists: the top-ranked genes from the PD profile up to rank  $x$  and the top-ranked genes from the Cmap profile up to rank  $y$ ; the magnitude of the significance is indicated using a color scheme, with red and green indicating high and low significance, respectively. Patterns like those seen in the panels, with red dominating in the lower left corner and lower intensities elsewhere indicate considerable overlap between the genes at the top of both gene lists.

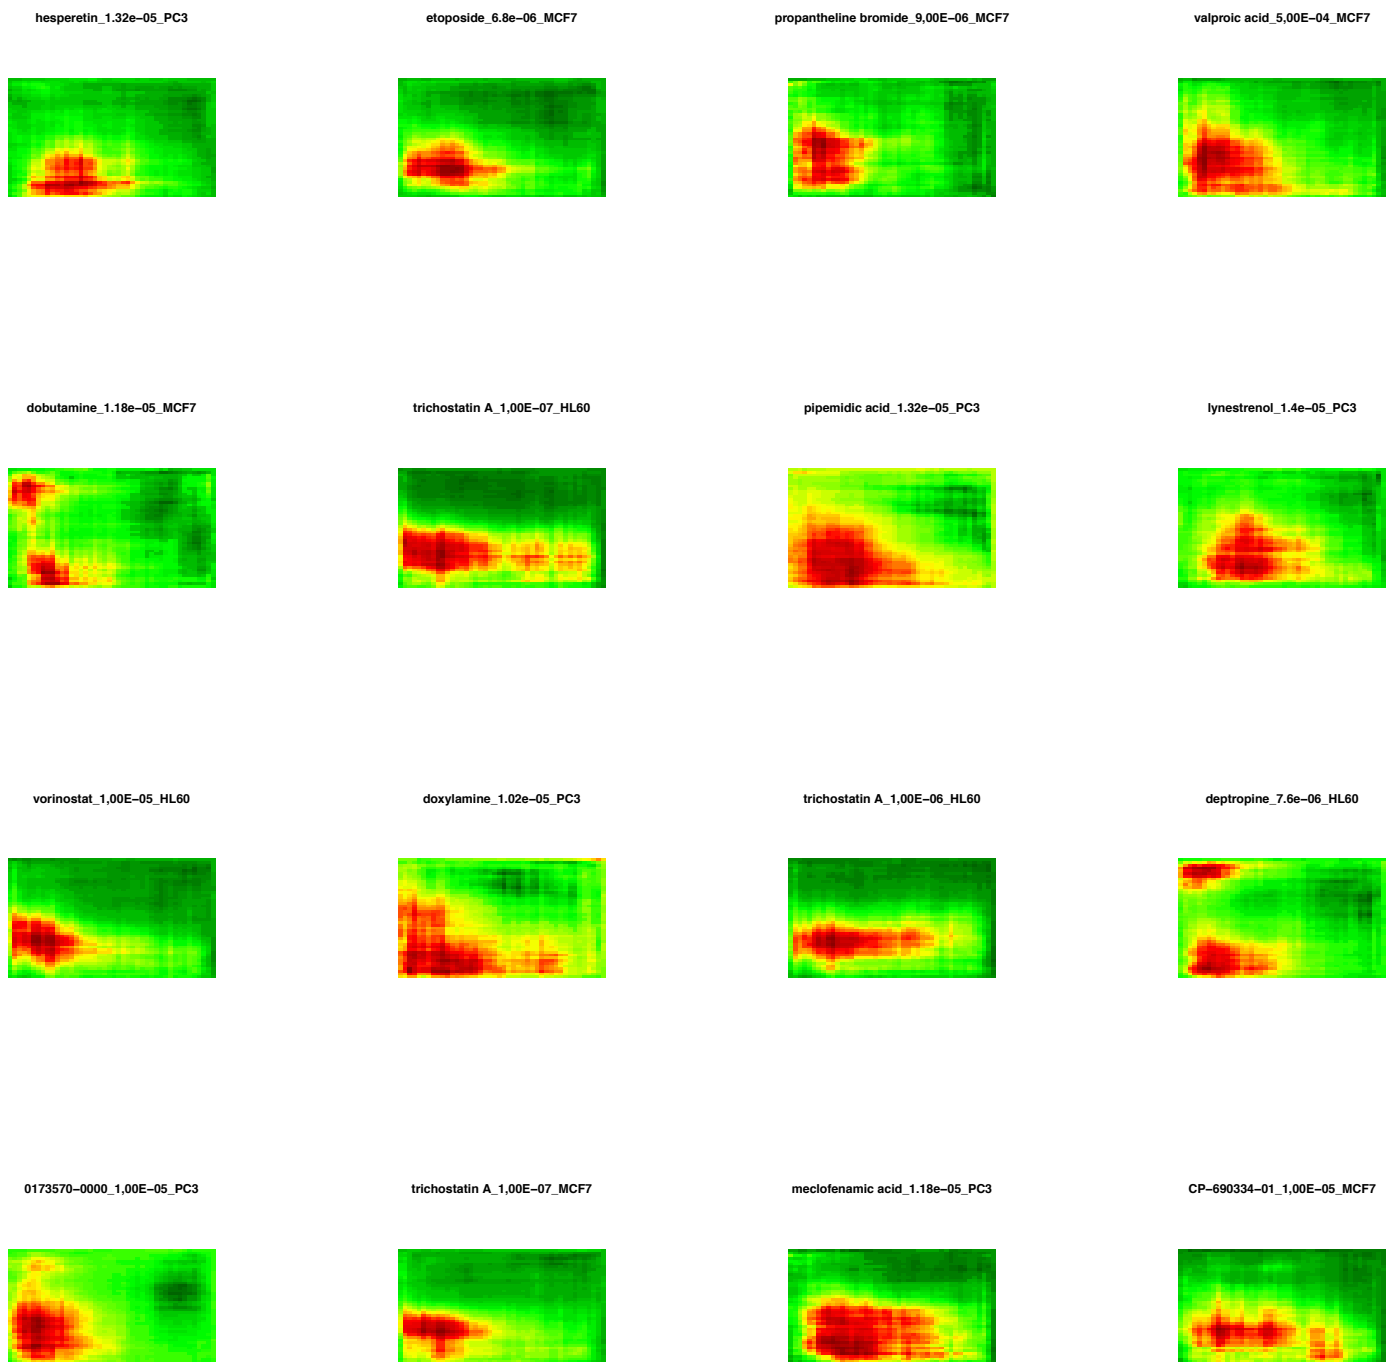

Supplement: 41598_2018_25754_MOESM1_ESM.pdf [file 41598_2018_25754_MOESM1_ESM.pdf]
